# Supplementary material for: Comparative Study on Inhibition of Pancreatic Cancer Cells by Resveratrol Gold Nanoparticles and a Resveratrol Nanoemulsion Prepared from Grape Skin
Source: MDPI journal article supplement (doi:10.3390/pharmaceutics13111871), 2021-11-05
Supplement: s1 [file s1]

# Supplementary Materials: Comparative Study on Inhibition of Pancreatic Cancer Cells by Resveratrol Gold Nanoparticles and a Resveratrol Nanoemulsion Prepared from Grape Skin

Baskaran Stephen Inbaraj, Leng-Huei Hua and Bing-Huei Chen

**Table S1.** Changes in particle size and zeta potential of resveratrol nanoemulsion during heating at 40–100 °C for varied time length.

| Temperature (°C) | Particle size (nm) |            |            |            |            | Zeta potential (mV) |             |             |             |             |
|------------------|--------------------|------------|------------|------------|------------|---------------------|-------------|-------------|-------------|-------------|
|                  | Heating time       |            |            |            |            | Heating time        |             |             |             |             |
|                  | 0 h                | 0.5 h      | 1 h        | 1.5 h      | 2 h        | 0 h                 | 0.5 h       | 1 h         | 1.5 h       | 2 h         |
| 40               | 14.1 ± 3.4         | 13.9 ± 1.8 | 14.4 ± 2.1 | 13.5 ± 5.3 | 14.9 ± 2.9 | −69.0 ± 2.9         | −62.1 ± 1.5 | −60.8 ± 0.9 | −54.6 ± 1.8 | −60.5 ± 1.9 |
| 60               | 14.1 ± 3.4         | 13.0 ± 1.3 | 12.0 ± 2.5 | 13.2 ± 3.1 | 15.6 ± 1.5 | −69.0 ± 2.9         | −59.3 ± 1.6 | −58.3 ± 0.2 | −56.7 ± 1.3 | −51.8 ± 0.3 |
| 80               | 14.1 ± 3.4         | 13.3 ± 4.9 | 13.8 ± 3.1 | 12.7 ± 3.7 | 15.8 ± 0.3 | −69.0 ± 2.9         | −51.3 ± 1.1 | −57.5 ± 2.7 | −50.0 ± 1.9 | −51.2 ± 2.9 |
| 100              | 14.1 ± 3.4         | 15.3 ± 2.8 | 17.9 ± 0.4 | 17.0 ± 4.8 | 17.1 ± 3.4 | −69.0 ± 2.9         | −29.8 ± 3.2 | −26.7 ± 4.1 | −23.8 ± 2.6 | −21.6 ± 0.2 |
